# Supplementary material for: Narrow environmental niches predict land-use responses and vulnerability of land snail assemblages
Source: PubMed Central journal article supplement (PMC7853316; doi:10.1186/s12862-020-01741-1), 2021-02-01
Supplement: 12862_2020_1741_MOESM1_ESM.pdf [file 12862_2020_1741_MOESM1_ESM.pdf]

Appendix 1. Summary of significant effects of land-use parameters and abiotic factors in forests (forest management index Formi, proportion of non-native trees, proportion of dead wood with saw cuts, proportion of wood harvested, pH and soil moisture) and grasslands (land-use index LUI, mowing, grazing, fertilization, pH and soil moisture) on the community weighted mean of the maximum shell size, the number of offspring, light preference, humidity preference, drought resistance and inundation tolerance. \* p < 0.05, \*\* p < 0.01, \*\*\* p < 0.001. ↓ negative effect, ↑ positive effect.

| Community weighed mean of: |                                       | Swabian Alb | Hainich | Schorfheide | Community weighed mean of: |               | Swabian Alb | Hainich | Schorfheide |      |
|----------------------------|---------------------------------------|-------------|---------|-------------|----------------------------|---------------|-------------|---------|-------------|------|
| Maximum shell size         | Formi                                 |             | ↑***    | ↓***        | Maximum shell size         | LUI           |             |         | ↓***        |      |
|                            | Proportion of non-native trees        | ↓***        | ↑***    | ↓*          |                            | Mowing        | ↓*          |         |             | ↓*   |
|                            | Proportion of dead wood with saw cuts | ↓***        | ↑*      | ↓***        |                            | Grazing       |             |         |             |      |
|                            | Proportion of wood harvested          | ↓***        | ↑**     |             |                            | Fertilization | ↑*          |         |             |      |
|                            | pH                                    | ↓**         | ↓***    | ↓***        |                            | pH            | ↓**         | ↓**     |             | ↓*** |
|                            | Soil moisture                         |             |         | ↓***        |                            | Soil moisture | ↓*          | ↓**     |             |      |
| Number of offspring        | Formi                                 |             | ↑**     |             | Number of offspring        | LUI           | ↑*          | ↑***    | ↓***        |      |
|                            | Proportion of non-native trees        |             | ↑***    | ↑*          |                            | Mowing        |             |         |             | ↑*** |
|                            | Proportion of dead wood with saw cuts | ↓***        |         |             |                            | Grazing       | ↓***        | ↑*      |             | ↓*** |
|                            | Proportion of wood harvested          |             |         |             |                            | Fertilization |             |         |             | ↓*   |
|                            | pH                                    |             | ↓***    | ↑***        |                            | pH            |             |         |             | ↑*** |
|                            | Soil moisture                         |             | ↓*      | ↑*          |                            | Soil moisture |             |         |             | ↑*** |
| Light preference           | Formi                                 |             |         | ↑***        | Light preference           | LUI           | ↑*          | ↑**     |             |      |
|                            | Proportion of non-native trees        |             | ↑***    | ↑***        |                            | Mowing        |             |         |             | ↑*** |
|                            | Proportion of dead wood with saw cuts | ↓**         |         |             |                            | Grazing       | ↓***        | ↑***    |             | ↓*** |
|                            | Proportion of wood harvested          |             |         |             |                            | Fertilization | ↓**         |         |             |      |
|                            | pH                                    |             | ↑*      | ↑*          |                            | pH            |             | ↑***    |             |      |
|                            | Soil moisture                         | ↑**         |         |             |                            | Soil moisture |             | ↑*      |             | ↑*   |
| Humidity preference        | Formi                                 | ↓*          | ↓***    | ↑***        | Humidity preference        | LUI           | ↑*          | ↑*      | ↓***        |      |
|                            | Proportion of non-native trees        | ↓***        | ↓***    | ↑***        |                            | Mowing        |             |         |             |      |
|                            | Proportion of dead wood with saw cuts | ↑***        | ↓**     | ↓***        |                            | Grazing       | ↓*          |         |             | ↓*** |
|                            | Proportion of wood harvested          | ↑**         | ↓*      |             |                            | Fertilization |             |         |             | ↓**  |
|                            | pH                                    |             | ↓***    | ↑***        |                            | pH            |             | ↓**     |             | ↑*** |
|                            | Soil moisture                         | ↑***        |         |             |                            | Soil moisture | ↓*          |         |             | ↑*** |
| Drought resistance         | Formi                                 |             | ↑*      | ↓***        | Drought resistance         | LUI           |             |         | ↑***        |      |
|                            | Proportion of non-native trees        | ↑***        | ↑**     | ↓***        |                            | Mowing        | ↓***        | ↓**     |             | ↑**  |
|                            | Proportion of dead wood with saw cuts | ↓***        |         |             |                            | Grazing       | ↓***        |         |             | ↓**  |
|                            | Proportion of wood harvested          | ↓***        |         |             |                            | Fertilization |             | ↓**     |             |      |
|                            | pH                                    |             | ↑*      | ↑*          |                            | pH            |             | ↑*      |             |      |
|                            | Soil moisture                         | ↓***        |         |             |                            | Soil moisture | ↓**         | ↑***    |             |      |
| Inundation tolerance       | Formi                                 | ↑***        | ↑*      |             | Inundation tolerance       | LUI           |             |         | ↓***        |      |
|                            | Proportion of non-native trees        | ↑***        | ↑***    |             |                            | Mowing        |             |         |             |      |
|                            | Proportion of dead wood with saw cuts | ↑***        |         |             |                            | Grazing       | ↓***        | ↑***    |             | ↓**  |
|                            | Proportion of wood harvested          | ↑***        |         | ↓**         |                            | Fertilization | ↓**         |         |             | ↓**  |
|                            | pH                                    | ↑***        | ↑***    | ↑*          |                            | pH            | ↑**         | ↑***    |             | ↑*** |
|                            | Soil moisture                         | ↓**         |         | ↑**         |                            | Soil moisture | ↑***        | ↑***    |             | ↑*** |
