# Supplementary material for: Narrow environmental niches predict land-use responses and vulnerability of land snail assemblages
Source: PubMed Central journal article supplement (PMC7853316; doi:10.1186/s12862-020-01741-1), 2021-02-01
Supplement: 12862_2020_1741_MOESM5_ESM.pdf [file 12862_2020_1741_MOESM5_ESM.pdf]

## Appendix 05

Influence of the abundance-weighted mean (AWM) of the proportion of wood harvested on the maximum shell size of offspring, light preference, humidity preference, drought resistance and inundation tolerance in forests. Species in *italics* are land-use “winners”, species in **bold** are land-use “losers”.

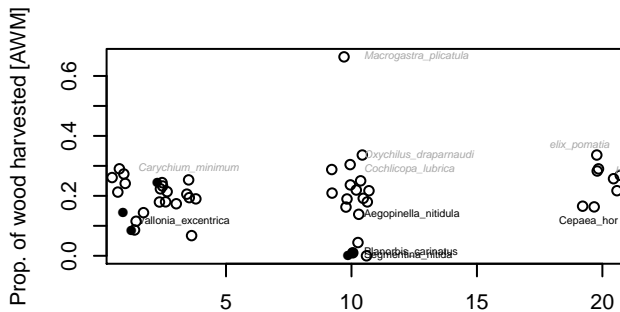

Max size [mm]

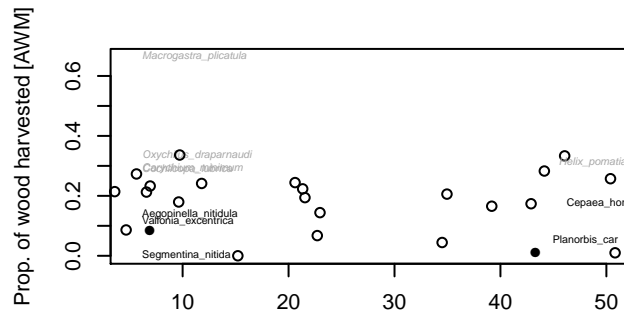

Number of offspring

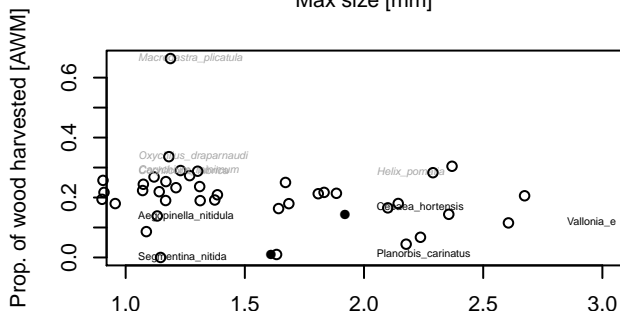

Light preference

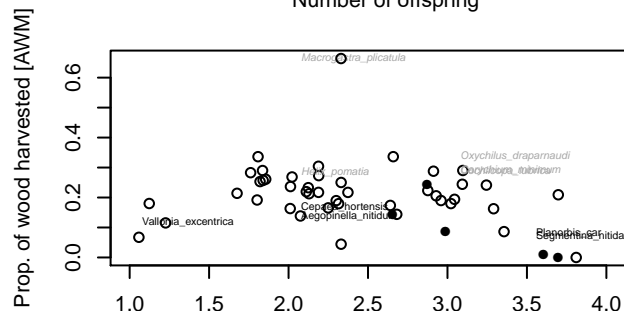

Humidity preference

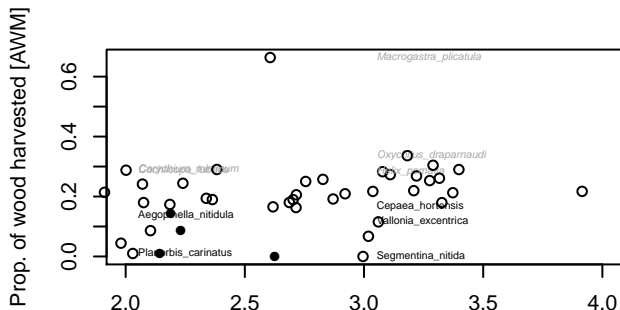

Drought resistance

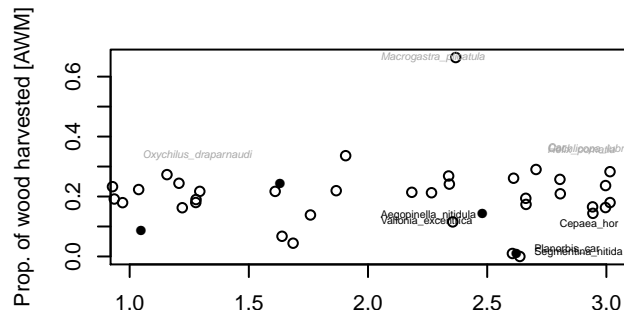

Inundation tolerance
